# Supplementary material
Source: HighWire-hosted journal article supplement (http://www.cmaj.ca/highwire/filestream/57619/field_highwire_adjunct_files/1/risk-tran-appendix_2.pdf)
Supplement: risk-tran-appendix_2.pdf [file risk-tran-appendix_2.pdf]

**Appendix 2** (as supplied by the authors): Clinical characteristics of children with asthma admitted with pandemic H1N1 influenza.

| <b>Age group (years)</b> | <b>Usual asthma medication</b>                                               | <b>Asthma severity</b> | <b>Other comorbidities</b>                   | <b>Previous asthma-related admission?</b> | <b>Previous intensive care unit admission?</b> | <b>Pneumonia?</b>         | <b>Intensive care unit admission?</b> | <b>Mechanical ventilation?</b> | <b>Reason for admission</b>    |
|--------------------------|------------------------------------------------------------------------------|------------------------|----------------------------------------------|-------------------------------------------|------------------------------------------------|---------------------------|---------------------------------------|--------------------------------|--------------------------------|
| >12 yrs                  | Salbutamol PRN                                                               | Mild                   | None                                         | No                                        | No                                             | Possible                  | Yes                                   | No                             | Toxic shock                    |
| 6-12                     | Salbutamol and fluticasone as required with upper respiratory infections     | Mild                   | None                                         | No                                        | No                                             | Yes                       | No                                    | No                             | Pneumonia                      |
| >12                      | Regular fluticasone                                                          | Moderate               | None                                         | Yes                                       | Yes                                            | No                        | No                                    | No                             | Acute bronchospasm             |
| 2-5                      | As required inhaled therapy with upper respiratory infections in remote past | Mild                   | Prematurity<br>Previous episode of pneumonia | No                                        | No                                             | Yes                       | Yes                                   | No                             | Pneumonia, severe bronchospasm |
| 2-5                      | Regular fluticasone; salbutamol as required                                  | Moderate               | Prematurity<br>Ileostomy                     | Yes                                       | Yes                                            | No                        | No                                    | No                             | Increased ileostomy losses     |
| >12                      | Regular budesonide/formoterol; salbutamol as required                        | Moderate               | None                                         | No                                        | No                                             | No (chest X-ray not done) | No                                    | No                             | Acute bronchospasm             |

*continued*

| <b>Appendix 2</b> (continued) |                                                                          |                        |                                                                                          |                                           |                                                |                   |                                       |                                |                               |
|-------------------------------|--------------------------------------------------------------------------|------------------------|------------------------------------------------------------------------------------------|-------------------------------------------|------------------------------------------------|-------------------|---------------------------------------|--------------------------------|-------------------------------|
| <b>Age group (years)</b>      | <b>Usual asthma medication</b>                                           | <b>Asthma severity</b> | <b>Other comorbidities</b>                                                               | <b>Previous asthma-related admission?</b> | <b>Previous intensive care unit admission?</b> | <b>Pneumonia?</b> | <b>Intensive care unit admission?</b> | <b>Mechanical ventilation?</b> | <b>Reason for admission</b>   |
| 6-12                          | Fluticasone as required; salbutamol pre-exercise; home nebulizer         | Moderate               | Prematurity<br>Ventricular septal defect closure at 8 months<br>Eczema<br>Peanut allergy | Yes                                       | No                                             | Yes               | No                                    | No                             | Pneumonia and bronchospasm    |
| 2-5                           | Salbutamol as required with upper respiratory infections                 | Mild                   | None                                                                                     | No                                        | No                                             | Yes               | No                                    | No                             | Pneumonia and bronchospasm    |
| 6-12                          | Fluticasone and salbutamol as required with upper respiratory infections | Mild                   | None                                                                                     | No                                        | No                                             | Yes               | Yes                                   | No                             | Bronchospasm with pneumonia   |
| 2-5                           | Regular fluticasone; salbutamol as required                              | Moderate               | None                                                                                     | Yes                                       | No                                             | Yes               | Yes                                   | Yes                            | Pneumonia, bronchospasm, ARDS |
| 6-12                          | Regular fluticasone; salbutamol as required                              | Moderate               | Ventricular septal defect closed spontaneously                                           | Yes                                       | No                                             | Probable          | No                                    | No                             | Bronchospasm and pneumonia    |

*continued*

**Appendix 2** (continued)

| <b>Age group (years)</b> | <b>Usual asthma medication</b>                                                | <b>Asthma severity</b>         | <b>Other comorbidities</b>                                              | <b>Previous asthma-related admission?</b> | <b>Previous intensive care unit admission?</b> | <b>Pneumonia?</b> | <b>Intensive care unit admission?</b> | <b>Mechanical ventilation?</b> | <b>Reason for admission</b> |
|--------------------------|-------------------------------------------------------------------------------|--------------------------------|-------------------------------------------------------------------------|-------------------------------------------|------------------------------------------------|-------------------|---------------------------------------|--------------------------------|-----------------------------|
| 2-5                      | Regular fluticasone/salmeterol; salbutamol as required;; previous montelukast | Severe                         | None known                                                              | Yes                                       | No                                             | No                | No                                    | No                             | Acute bronchospasm          |
| 6-12                     | Fluticasone and salbutamol as required                                        | Moderate (with poor adherence) | Prematurity<br>Mild developmental delay<br>Mild scoliosis<br>Overweight | Yes                                       | No                                             | Yes               | Yes                                   | Yes                            | Pneumonia, ARDS             |
